# Supplementary material for: Accuracy of self-diagnosis in conditions commonly managed in primary care: diagnostic accuracy systematic review and meta-analysis
Source: PubMed Central journal article supplement (PMC9835960; doi:10.1136/bmjopen-2022-065748), 2023-01-10
Supplement: bmjopen-2022-065748supp001.pdf [file bmjopen-2022-065748supp001.pdf]

**SUPPLEMENTARY MATERIAL****Supplementary Table 1: Commonly managed conditions in primary care**

As reported by Cooke et al 2013 (Cooke G, Valenti L, Glasziou P, Britt H. Common general practice presentations and publication frequency. *Australian Family Physician*. 2013; 42:65-8)

|    |                                         |
|----|-----------------------------------------|
| 1  | Hypertension                            |
| 2  | Immunisation/vaccination: all           |
| 3  | Acute upper respiratory tract infection |
| 4  | Depression                              |
| 5  | Diabetes: nongestational                |
| 6  | Lipid disorders                         |
| 7  | General check-up                        |
| 8  | Osteoarthritis                          |
| 9  | Back complaint                          |
| 10 | Prescription                            |
| 11 | Oesophagus disease                      |
| 12 | Female genital check-up                 |
| 13 | Acute bronchitis/bronchiolitis          |
| 14 | Asthma                                  |
| 15 | Anxiety                                 |
| 16 | Test results                            |
| 17 | Urinary tract infection                 |
| 18 | Dermatitis, contact/allergic            |
| 19 | Pregnancy                               |
| 20 | Sleep disturbance                       |
| 21 | Sinusitis acute/chronic                 |
| 22 | Gastroenteritis                         |
| 23 | Vitamin/nutritional deficiency          |

|    |                                        |
|----|----------------------------------------|
| 24 | Malignant neoplasm of skin             |
| 25 | Abnormal test results                  |
| 26 | Atrial fibrillation/flutter            |
| 27 | Oral contraception                     |
| 28 | Solar keratosis/sunburn                |
| 29 | Ischaemic heart disease                |
| 30 | Viral disease, not otherwise specified |

**Supplementary Table 2: Search strategy**

| <b>Medline</b> |                                                                                                                                                                                                                                                                                          |
|----------------|------------------------------------------------------------------------------------------------------------------------------------------------------------------------------------------------------------------------------------------------------------------------------------------|
| <b>#</b>       | <b>Searches</b>                                                                                                                                                                                                                                                                          |
| 1              | Diagnostic Self Evaluation/                                                                                                                                                                                                                                                              |
| 2              | ((self* adj diagnos*) or selfdiagnos*).ti,ab.                                                                                                                                                                                                                                            |
| 3              | (self* and diagnos*).ti.                                                                                                                                                                                                                                                                 |
| 4              | ((self* adj test*) or selftest*).ti,ab.                                                                                                                                                                                                                                                  |
| 5              | (home adj3 diagnos*).ti,ab.                                                                                                                                                                                                                                                              |
| 6              | ((selfreport* or self-report*) and diagnos*).ti.                                                                                                                                                                                                                                         |
| 7              | ((selfreport* or self-report*) adj5 diagnos*).ti,ab.                                                                                                                                                                                                                                     |
| 8              | (diagnos* and (selftreat* or self-treat*)).ti,ab.                                                                                                                                                                                                                                        |
| 9              | 1 or 2 or 3 or 4 or 5 or 6 or 7 or 8                                                                                                                                                                                                                                                     |
| 10             | respiratory tract infections/ or common cold/ or influenza, human/ or laryngitis/ or exp pharyngitis/ or rhinitis/ or exp sinusitis/ or exp supraglottitis/ or tracheitis/ or exp otitis media/                                                                                          |
| 11             | ((((respirat* or airway*) adj2 infection*) or (common cold or influenza or flu or pharyngitis or laryngitis or tonsillitis or sore throat or rhinitis or nasopharyngitis or nasolaryngitis or sinusitis or supraglottitis or epiglottitis or tracheitis or urti or otitis media)).ti,ab. |
| 12             | exp Depressive Disorder/ or Depression/                                                                                                                                                                                                                                                  |
| 13             | (depress* or (mood adj2 disorder*)).ti,ab.                                                                                                                                                                                                                                               |
| 14             | diabetes mellitus/ or exp diabetes mellitus, type 1/ or exp diabetes mellitus, type 2/                                                                                                                                                                                                   |
| 15             | diabet*.ti,ab.                                                                                                                                                                                                                                                                           |
| 16             | dyslipidemias/ or exp hyperlipidemias/                                                                                                                                                                                                                                                   |
| 17             | (dyslipid?emia? or hyperlipid?emia? or hypercholesterol?emia? or cholesterol* or triglyceride*).ti,ab.                                                                                                                                                                                   |
| 18             | hypertension/                                                                                                                                                                                                                                                                            |
| 19             | (hypertens* or high blood pressure).ti,ab.                                                                                                                                                                                                                                               |
| 20             | exp Osteoarthritis/                                                                                                                                                                                                                                                                      |
| 21             | (osteoarthritis or osteo-arthritis or (degenerat* adj2 arthritis)).ti,ab.                                                                                                                                                                                                                |
| 22             | back pain/ or low back pain/                                                                                                                                                                                                                                                             |
| 23             | Sciatica/                                                                                                                                                                                                                                                                                |
| 24             | Intervertebral Disc Displacement/                                                                                                                                                                                                                                                        |
| 25             | ((back adj2 (pain or problem? or disorder?)) or slipped disc* or sciatica).ti,ab.                                                                                                                                                                                                        |
| 26             | Esophageal Diseases/ or esophageal motility disorders/ or exp gastroesophageal reflux/ or Barrett Esophagus/                                                                                                                                                                             |
| 27             | ((oesophag* or esophag*) adj2 disease).ti,ab.                                                                                                                                                                                                                                            |
| 28             | ((((oesophag* or esophag* or gastr*) adj2 reflux) or heartburn or heart burn).ti,ab.                                                                                                                                                                                                     |
| 29             | ((barrett* or globus) adj2 (esophag* or oesophag*)).ti,ab.                                                                                                                                                                                                                               |
| 30             | exp Asthma/                                                                                                                                                                                                                                                                              |
| 31             | asthma*.ti,ab.                                                                                                                                                                                                                                                                           |

|               |                                                                                                                                                                                                                                                                                          |
|---------------|------------------------------------------------------------------------------------------------------------------------------------------------------------------------------------------------------------------------------------------------------------------------------------------|
| 32            | exp Anxiety Disorders/ or Anxiety/                                                                                                                                                                                                                                                       |
| 33            | (anxiety or phobia*).ti,ab.                                                                                                                                                                                                                                                              |
| 34            | exp Urinary Tract Infections/                                                                                                                                                                                                                                                            |
| 35            | exp Cystitis/                                                                                                                                                                                                                                                                            |
| 36            | ((urin* adj3 infection*) or bacteriuria or pyuria or cystitis).ti,ab.                                                                                                                                                                                                                    |
| 37            | exp Vaginitis/                                                                                                                                                                                                                                                                           |
| 38            | (vaginitis or vaginosis).ti,ab.                                                                                                                                                                                                                                                          |
| 39            | dermatitis/ or exp dermatitis, contact/ or eczema/                                                                                                                                                                                                                                       |
| 40            | (dermatitis or eczema).ti,ab.                                                                                                                                                                                                                                                            |
| 41            | exp Sleep Wake Disorders/                                                                                                                                                                                                                                                                |
| 42            | exp Sleep Apnea Syndromes/                                                                                                                                                                                                                                                               |
| 43            | ((sleep adj2 (disorder* or disturbance*)) or insomnia*).ti,ab.                                                                                                                                                                                                                           |
| 44            | (sleep adj2 (apnea or apnoea)).ti,ab.                                                                                                                                                                                                                                                    |
| 45            | restless leg*.ti,ab.                                                                                                                                                                                                                                                                     |
| 46            | Gastroenteritis/ or diarrhea/ or vomiting/                                                                                                                                                                                                                                               |
| 47            | (gastroenteritis or (stomach adj2 (bug? or upset))).ti,ab.                                                                                                                                                                                                                               |
| 48            | (diarrhoea or diarrhea or food poisoning).ti,ab.                                                                                                                                                                                                                                         |
| 49            | Sunburn/                                                                                                                                                                                                                                                                                 |
| 50            | (sunburn or solar keratosis).ti,ab.                                                                                                                                                                                                                                                      |
| 51            | or/10-50                                                                                                                                                                                                                                                                                 |
| 52            | 9 and 51                                                                                                                                                                                                                                                                                 |
| 53            | exp "Sensitivity and Specificity"/                                                                                                                                                                                                                                                       |
| 54            | exp "REPRODUCIBILITY OF RESULTS"/                                                                                                                                                                                                                                                        |
| 55            | (sensitiv* or specific* or predict* or accura* or valid* or reproduc*).ti,ab.                                                                                                                                                                                                            |
| 56            | 53 or 54 or 55                                                                                                                                                                                                                                                                           |
| 57            | 52 and 56                                                                                                                                                                                                                                                                                |
| <b>Embase</b> |                                                                                                                                                                                                                                                                                          |
| <b>#</b>      | <b>Searches</b>                                                                                                                                                                                                                                                                          |
| 1             | *Self Evaluation/                                                                                                                                                                                                                                                                        |
| 2             | ((self* adj diagnos*) or selfdiagnos*).ti,ab.                                                                                                                                                                                                                                            |
| 3             | (self* and diagnos*).ti.                                                                                                                                                                                                                                                                 |
| 4             | ((self* adj test*) or selftest*).ti,ab.                                                                                                                                                                                                                                                  |
| 5             | (home adj3 diagnos*).ti,ab.                                                                                                                                                                                                                                                              |
| 6             | ((selfreport* or self-report*) and diagnos*).ti.                                                                                                                                                                                                                                         |
| 7             | ((selfreport* or self-report*) adj5 diagnos*).ti,ab.                                                                                                                                                                                                                                     |
| 8             | (diagnos* and (selftreat* or self-treat*)).ti,ab.                                                                                                                                                                                                                                        |
| 9             | 1 or 2 or 3 or 4 or 5 or 6 or 7 or 8                                                                                                                                                                                                                                                     |
| 10            | respiratory tract infection/ or upper respiratory tract infection/ or exp respiratory tract inflammation/ or influenza/ or otitis media/                                                                                                                                                 |
| 11            | ((((respirat* or airway*) adj2 infection*) or (common cold or influenza or flu or pharyngitis or laryngitis or tonsillitis or sore throat or rhinitis or nasopharyngitis or nasolaryngitis or sinusitis or supraglottitis or epiglottitis or tracheitis or urti or otitis media)).ti,ab. |

|    |                                                                                                        |
|----|--------------------------------------------------------------------------------------------------------|
| 12 | exp Depression/                                                                                        |
| 13 | (depress* or (mood adj2 disorder*)).ti,ab.                                                             |
| 14 | diabetes mellitus/ or exp diabetes mellitus, type 1/ or exp diabetes mellitus, type 2/                 |
| 15 | diabet*.ti,ab.                                                                                         |
| 16 | dyslipidemia/ or exp hyperlipidemia/                                                                   |
| 17 | (dyslipid?emia? or hyperlipid?emia? or hypercholesterol?emia? or cholesterol* or triglyceride*).ti,ab. |
| 18 | hypertension/                                                                                          |
| 19 | (hypertens* or high blood pressure).ti,ab.                                                             |
| 20 | exp Osteoarthritis/                                                                                    |
| 21 | (osteoarthritis or osteo-arthritis or (degenerat* adj2 arthritis)).ti,ab.                              |
| 22 | backache/ or discogenic pain/ or low back pain/                                                        |
| 23 | Sciatica/                                                                                              |
| 24 | intervertebral disk hernia/ or intervertebral disk disease/                                            |
| 25 | ((back adj2 (pain or problem? or disorder?)) or slipped disc* or sciatica).ti,ab.                      |
| 26 | exp gastroesophageal reflux/ or barrett esophagus/ or esophagus disease/                               |
| 27 | ((oesophag* or esophag*) adj2 disease).ti,ab.                                                          |
| 28 | ((oesophag* or esophag* or gastr*) adj2 reflux) or heartburn or heart burn).ti,ab.                     |
| 29 | ((barrett* or globus) adj2 (esophag* or oesophag*)).ti,ab.                                             |
| 30 | exp Asthma/                                                                                            |
| 31 | asthma*.ti,ab.                                                                                         |
| 32 | exp Anxiety Disorder/                                                                                  |
| 33 | (anxiety or phobia*).ti,ab.                                                                            |
| 34 | exp Urinary Tract Infection/                                                                           |
| 35 | Cystitis/                                                                                              |
| 36 | ((urin* adj3 infection*) or bacteriuria or pyuria or cystitis).ti,ab.                                  |
| 37 | vagina discharge/ or exp vaginitis/                                                                    |
| 38 | (vaginitis or vaginosis).ti,ab.                                                                        |
| 39 | dermatitis/ or contact dermatitis/ or exp eczema/                                                      |
| 40 | (dermatitis or eczema).ti,ab.                                                                          |
| 41 | sleep disorder/ or exp insomnia/ or periodic limb movement disorder/                                   |
| 42 | exp sleep disordered breathing/                                                                        |
| 43 | ((sleep adj2 (disorder* or disturbance*)) or insomnia*).ti,ab.                                         |
| 44 | (sleep adj2 (apnea or apnoea)).ti,ab.                                                                  |
| 45 | restless leg*.ti,ab.                                                                                   |
| 46 | Gastroenteritis/ or diarrhea/ or vomiting/                                                             |
| 47 | (gastroenteritis or (stomach adj2 (bug? or upset))).ti,ab.                                             |
| 48 | (diarrhoea or diarrhea or food poisoning).ti,ab.                                                       |
| 49 | Sunburn/                                                                                               |
| 50 | (sunburn or solar keratosis).ti,ab.                                                                    |
| 51 | or/10-50                                                                                               |

|                 |                                                                                                                                                                                                                                                        |
|-----------------|--------------------------------------------------------------------------------------------------------------------------------------------------------------------------------------------------------------------------------------------------------|
| 52              | 9 and 51                                                                                                                                                                                                                                               |
| 53              | "Sensitivity and Specificity"/                                                                                                                                                                                                                         |
| 54              | diagnostic accuracy/ or diagnostic test accuracy study/                                                                                                                                                                                                |
| 55              | predictive validity/ or predictive value/ or reproducibility/                                                                                                                                                                                          |
| 56              | (sensitiv* or specific* or predict* or accura* or valid* or reproduc*).ti,ab.                                                                                                                                                                          |
| 57              | 53 or 54 or 55 or 56                                                                                                                                                                                                                                   |
| 58              | 52 and 57                                                                                                                                                                                                                                              |
| <b>Cochrane</b> |                                                                                                                                                                                                                                                        |
| <b>ID</b>       | <b>Search</b>                                                                                                                                                                                                                                          |
| #1              | MeSH descriptor: [Diagnostic Self Evaluation] explode all trees                                                                                                                                                                                        |
| #2              | ((self* AND diagnos*) or selfdiagnos*):ti OR (((self* NEXT diagnos*) or selfdiagnos*):ti,ab,kw OR (((self* NEXT test*) or selftest*):ti,ab,kw OR (home NEAR/3 diagnos*):ti,ab,kw                                                                       |
| #3              | ((selfreport* or self-report*) and diagnos*):ti OR (((selfreport* or self-report*) NEAR diagnos*):ti,ab,kw OR ((diagnos* and (selftreat* or self-treat*)):ti,ab,kw                                                                                     |
| #4              | #1 OR #2 OR #3                                                                                                                                                                                                                                         |
| #5              | MeSH descriptor: [Sensitivity and Specificity] explode all trees                                                                                                                                                                                       |
| #6              | MeSH descriptor: [Reproducibility of Results] explode all trees                                                                                                                                                                                        |
| #7              | (sensitiv* or specific* or predict* or accura* or valid* or reproduc*):ti,ab,kw                                                                                                                                                                        |
| #8              | #5 OR #6 OR #7                                                                                                                                                                                                                                         |
| #9              | #4 AND #8                                                                                                                                                                                                                                              |
| <b>Cinahl</b>   |                                                                                                                                                                                                                                                        |
| <b>#</b>        | <b>Query</b>                                                                                                                                                                                                                                           |
| S39             | S3 AND S35 AND S38                                                                                                                                                                                                                                     |
| S38             | S36 OR S37                                                                                                                                                                                                                                             |
| S37             | TX sensitiv* or specific* or predict* or accura* or valid* or reproduc*                                                                                                                                                                                |
| S36             | (MH "Sensitivity and Specificity") OR (MH "Predictive Value of Tests")                                                                                                                                                                                 |
| S35             | (S4 OR S5 OR S6 OR S7 OR S8 OR S9 OR S10 OR S11 OR S12 OR S13 OR S14 OR S15 OR S16 OR S17 OR S18 OR S19 OR S20 OR S21 OR S22 OR S23 OR S24 OR S25 OR S26 OR S27 OR S28 OR S29 OR S30 OR S31 OR S32 OR S33 OR S34)                                      |
| S34             | TI ( sunburn or "solar keratosis" ) OR AB ( sunburn or "solar keratosis" )                                                                                                                                                                             |
| S33             | (MH "Sunburn")                                                                                                                                                                                                                                         |
| S32             | TI ( (gastroenteritis or (stomach N2 (bug or bugs or upset))) ) OR AB ( (gastroenteritis or (stomach N2 (bug or bugs or upset))) ) OR TI ( diarrhoea or diarrhea or "food poisoning" ) OR AB ( diarrhoea or diarrhea or "food poisoning" )             |
| S31             | (MH "Gastroenteritis") OR (MH "Vomiting") OR (MH "Diarrhea")                                                                                                                                                                                           |
| S30             | TI ( ((sleep N2 (disorder* or disturbance*)) or insomnia*) ) OR AB ( ((sleep N2 (disorder* or disturbance*)) or insomnia*) ) OR TI ( (sleep N2 (apnea or apnoea)) ) OR AB ( (sleep N2 (apnea or apnoea)) ) OR TI "restless legs" OR AB "restless legs" |
| S29             | (MH "Sleep Disorders, Intrinsic+")                                                                                                                                                                                                                     |
| S28             | TI ( dermatitis or eczema ) OR AB ( dermatitis or eczema )                                                                                                                                                                                             |
| S27             | (MH "Dermatitis") OR (MH "Dermatitis, Contact+") OR (MH "Eczema")                                                                                                                                                                                      |
| S26             | TI ( vaginitis or vaginosis ) OR AB ( vaginitis or vaginosis )                                                                                                                                                                                         |

|     |                                                                                                                                                                                                                                                                                                                                                                                                                                                                                                                                                                                                |
|-----|------------------------------------------------------------------------------------------------------------------------------------------------------------------------------------------------------------------------------------------------------------------------------------------------------------------------------------------------------------------------------------------------------------------------------------------------------------------------------------------------------------------------------------------------------------------------------------------------|
| S25 | (MH "Vaginitis+")                                                                                                                                                                                                                                                                                                                                                                                                                                                                                                                                                                              |
| S24 | TI ( ((urin* N3 infection*) or bacteriuria or pyuria or cystitis) ) OR AB ( ((urin* N3 infection*) or bacteriuria or pyuria or cystitis) )                                                                                                                                                                                                                                                                                                                                                                                                                                                     |
| S23 | (MH "Urinary Tract Infections+") OR (MH "Cystitis")                                                                                                                                                                                                                                                                                                                                                                                                                                                                                                                                            |
| S22 | TI asthma* OR AB asthma*                                                                                                                                                                                                                                                                                                                                                                                                                                                                                                                                                                       |
| S21 | (MH "Asthma+")                                                                                                                                                                                                                                                                                                                                                                                                                                                                                                                                                                                 |
| S20 | TI ( ((oesophag* or esophag*) N2 disease) ) OR ( ((oesophag* or esophag*) N2 disease) ) OR TI ( (((oesophag* or esophag* or gastr*) N2 reflux) or heartburn or "heart burn" ) ) OR AB ( (((oesophag* or esophag* or gastr*) N2 reflux) or heartburn or "heart burn" ) ) OR ( ((barrett* or globus) N2 (esophag* or oesophag*)) ) OR ( ((barrett* or globus) N2 (esophag* or oesophag*)) )                                                                                                                                                                                                      |
| S19 | (MH "Gastroesophageal Reflux") OR (MH "Esophageal Motility Disorders") OR (MH "Esophageal Diseases") OR (MH "Barrett Esophagus")                                                                                                                                                                                                                                                                                                                                                                                                                                                               |
| S18 | TI ( ((back N2 (pain or problem* or disorder*)) or "slipped disc*" or sciatica) ) OR AB ( ((back N2 (pain or problem* or disorder*)) or "slipped disc*" or sciatica) )                                                                                                                                                                                                                                                                                                                                                                                                                         |
| S17 | (MH "Low Back Pain") OR (MH "Back Pain") OR (MH "Sciatica") OR (MH "Intervertebral Disk Displacement")                                                                                                                                                                                                                                                                                                                                                                                                                                                                                         |
| S16 | TI ( (osteoarthritis or osteo-arthritis or (degenerat* N2 arthritis) ) ) OR AB ( (osteoarthritis or osteo-arthritis or (degenerat* N2 arthritis) ) )                                                                                                                                                                                                                                                                                                                                                                                                                                           |
| S15 | (MH "Osteoarthritis+")                                                                                                                                                                                                                                                                                                                                                                                                                                                                                                                                                                         |
| S14 | TI ( hypertens* or "high blood pressure" ) OR AB ( hypertens* or "high blood pressure" )                                                                                                                                                                                                                                                                                                                                                                                                                                                                                                       |
| S13 | (MH "Hypertension")                                                                                                                                                                                                                                                                                                                                                                                                                                                                                                                                                                            |
| S12 | TI ( dyslipidemia* or hyperlipidemia* or hypercholesterolemia* or dyslipidaemia* or hyperlipidaemia* or hypercholesterolaemia* or cholesterol* or triglyceride* ) OR AB ( dyslipidemia* or hyperlipidemia* or hypercholesterolemia* or dyslipidaemia* or hyperlipidaemia* or hypercholesterolaemia* or cholesterol* or triglyceride* )                                                                                                                                                                                                                                                         |
| S11 | (MH "Hyperlipidemia+")                                                                                                                                                                                                                                                                                                                                                                                                                                                                                                                                                                         |
| S10 | TI diabet* OR AB diabet*                                                                                                                                                                                                                                                                                                                                                                                                                                                                                                                                                                       |
| S9  | (MH "Diabetes Mellitus") OR (MH "Diabetes Mellitus, Type 1") OR (MH "Diabetes Mellitus, Type 2")                                                                                                                                                                                                                                                                                                                                                                                                                                                                                               |
| S8  | TI ( (depress* OR anxiety or (mood N2 disorder*)) ) OR AB ( (depress* OR anxiety or (mood N2 disorder*)) )                                                                                                                                                                                                                                                                                                                                                                                                                                                                                     |
| S7  | (MH "Depression") OR (MH "Anxiety")                                                                                                                                                                                                                                                                                                                                                                                                                                                                                                                                                            |
| S6  | TI ( (((respirat* or airway*) N2 infection*) or ("common cold" or influenza or flu or pharyngitis or laryngitis or tonsillitis or "sore throat" or rhinitis or nasopharyngitis or nasolaryngitis or sinusitis or supraglottitis or epiglottitis or tracheitis or urti or "otitis media" ) ) ) OR AB ( (((respirat* or airway*) N2 infection*) or ("common cold" or influenza or flu or pharyngitis or laryngitis or tonsillitis or "sore throat" or rhinitis or nasopharyngitis or nasolaryngitis or sinusitis or supraglottitis or epiglottitis or tracheitis or urti or "otitis media" ) ) ) |
| S5  | (MH "Otitis Media+")                                                                                                                                                                                                                                                                                                                                                                                                                                                                                                                                                                           |
| S4  | (MH "Respiratory Tract Infections") OR (MH "Common Cold") OR (MH "Influenza") OR (MH "Influenza, Human+") OR (MH "Laryngitis+") OR (MH "Pharyngitis") OR (MH "Rhinitis+") OR (MH "Sinusitis+") OR (MH "Tonsillitis+")                                                                                                                                                                                                                                                                                                                                                                          |

|    |                                                                                                                                                                                                                                                                                                                                                                                                                                                            |
|----|------------------------------------------------------------------------------------------------------------------------------------------------------------------------------------------------------------------------------------------------------------------------------------------------------------------------------------------------------------------------------------------------------------------------------------------------------------|
| S3 | S1 OR S2                                                                                                                                                                                                                                                                                                                                                                                                                                                   |
| S2 | TI ( ((self* AND diagnos*) or selfdiagnos*) ) OR AB ( ((self* N1 diagnos*) or selfdiagnos*) ) OR TI ( ((self* N1 test*) or selftest*) ) OR AB ( ((self* N1 test*) or selftest*) ) OR TI (home N3 diagnos*) OR AB (home N3 diagnos*) OR TI ( ((selfreport* or self-report*) and diagnos*) ) OR AB ( ((selfreport* or self-report*) N5 diagnos*) ) OR TI ( (diagnos* and (selftreat* or self-treat*)) ) OR AB ( (diagnos* and (selftreat* or self-treat*)) ) |
| S1 | (MH "Self Diagnosis")                                                                                                                                                                                                                                                                                                                                                                                                                                      |



**Supplementary table 3: Data items included in extraction sheet (where available)**

|                                                                                                                   |
|-------------------------------------------------------------------------------------------------------------------|
| Study identification - author, year, location                                                                     |
| Study research question                                                                                           |
| Study design and setting                                                                                          |
| Study funding source                                                                                              |
| Target condition definition/diagnostic criteria                                                                   |
| Participant characteristics and numbers, including exclusions                                                     |
| Index test                                                                                                        |
| Reference standard                                                                                                |
| Flow of participants through study including losses to follow-up                                                  |
| Patient presentation and prior testing                                                                            |
| Conduct of the study including timing of the tests, and information on masking                                    |
| Absolute counts of true positive (TP), false positive (FP), false negative (FN) and true negative (TN) diagnoses. |
| Statistical analyses that were performed, including whether all participants were included in analyses            |
| Additional summary information on participant preference, timing, or cost, as available.                          |

**Supplementary table 4: Protocol****Accuracy of self-diagnosis in conditions commonly managed in primary care: diagnostic accuracy review**

Annette Plüddemann <sup>1</sup>, Hayley E Jones <sup>2</sup>, Carl Heneghan <sup>1</sup>

1. Nuffield Department of Primary Care Health Sciences, University of Oxford, OX2 6GG
2. Population Health Sciences, Bristol Medical School, University of Bristol, BS8 2PS

**Background and rationale**

A wide range of conditions present to primary care, some acute, some chronic. As a consequence primary care is facing increasing workload (Hobbs et al 2016) that may become unmanageable.

Some common conditions in primary care, therefore, have the potential to be self-diagnosed and self-treated by the patients themselves. This offers superior convenience for individuals, swifter diagnosis and treatment where relevant, reduced costs for health service providers and potentially reduce the burden on primary care services. Self-diagnosis may apply to initial diagnosis, or to diagnosing an exacerbation of an ongoing condition, such as an exacerbation of chronic obstructive pulmonary disease (COPD). In order to support self-diagnosis where safe and appropriate, the efficacy of self-diagnosis needs to be assessed, and this information used to make evidence-based decisions on who can self-diagnose safely.

Where there is an available comparison with diagnosis by a healthcare professional, it is possible to assess the accuracy of self-diagnosis. A further comparison could potentially be made with diagnosis by an allied healthcare professional such as pharmacists, but this is outside the scope of this current review. Sometimes, self-diagnosis involves using a diagnostic test (any type of medical test used to help diagnose or detect disease). For conditions where this is available and appropriate, the accuracy of these tests also informs the safety and efficacy of self-diagnosis by the patient.

Previous studies on the safety and accuracy of self-diagnosis of conditions commonly managed in primary care setting include self-diagnosis of urinary tract infection (Donofrio & Weiner 2013), high blood pressure (Tormo et al 2000) and depression (Hedayati et al 2006).

This review aims to identify, appraise and summarise the available evidence on self-diagnosis in common conditions in primary care. Cooke and colleagues recently reported the 30 most commonly managed conditions in primary care in Australia, which has a health landscape broadly comparable with western Europe (Cooke et al 2013). This list arises from survey data collected between January 2009 and December 2010, which included 194,100 patient encounters from 1,941 GPs. The most commonly managed conditions included some with the potential for self-diagnosis, e.g. urinary tract infection, as well as some that would be unsuitable for self-diagnosis, such as "general check-up". We base our review on conditions

from this list that are relevant for self-diagnosis. We may review infectious diseases and non-communicable diseases separately.

## **Objectives**

### ***Primary objective***

Our primary objective is to summarize the accuracy of self-diagnosis of common conditions in primary care, compared with diagnosis by a healthcare provider.

### ***Secondary objective***

To summarise any associated relevant information relating to self-diagnosis of common conditions in primary care, such as information on patient preference, timing, or cost (only using information from studies we include for accuracy data). Where there is substantial qualitative information reported, this will only be summarised briefly; detailed qualitative approaches will not be used.

## **Methods**

### **Criteria for considering studies for this review**

#### ***Types of studies***

Prospective or retrospective studies comparing the results of self-diagnosis of common self-limiting conditions in primary care by free-living individuals, to the results of a reference standard test performed by a healthcare service provider, will be included. Studies with a case-control design will be excluded. In case of duplicate publications we will include the study report with the highest methodological quality. There will be no language restrictions.

We will exclude studies comparing self-diagnosis with diagnosis by allied health professionals such as a pharmacists.

#### ***Participants***

Adults ( $\geq 18$  years of age) self-diagnosing conditions common in primary care.

#### ***Index tests***

Index tests will be the self-testing or self-diagnosis of relevant conditions, compared with diagnosis by a healthcare practitioner.

#### ***Comparator tests***

Comparator tests will comprise diagnosis by a healthcare practitioner.

#### ***Outcome measures***

Diagnostic accuracy measures (e.g. sensitivity, specificity, likelihood ratios, predictive values, etc.) and primary data for 2x2 tables. Studies reporting only measures of agreement will be excluded.

**Search methods to identify studies*****Electronic searches***

The search strategy will be developed in consultation with a healthcare librarian experienced with supporting systematic reviews. No language restrictions will be applied. The search strategy will use multiple electronic databases, from inception onwards including:

Medline

EMBASE

Cochrane Central Register of Controlled Trials (CENTRAL)

Trip database

Web of Science for conference proceedings, dissertations, and theses

World Health Organization International Clinical Trials Registry Platform (ICTRP),

ClinicalTrials.gov

Database of Abstracts of Reviews of Effect (DARE)

We will also search Science Citation Index Expanded for study reports that cite the included studies.

The search may use relevant filters, but in order to maximise sensitivity, will not be limited to these. The reference lists of relevant studies will be examined and additional tools such as the “related articles” feature in PubMed will also be used to identify relevant publications.

**Data collection and analysis*****Selection of studies***

Two reviewers will independently apply the selection criteria to the titles and abstracts of the study reports identified by the searches. If the decision to exclude a study cannot be made on the basis of the title and the abstract, the full study report will be retrieved for inclusion assessment. The final decision on inclusion will be based on the full study report.

Disagreements between reviewers will be resolved by discussion, or if necessary by a third reviewer. Study identification will be summarised in a PRISMA flow diagram.

***Data extraction and management***

Two reviewers will independently extract information from selected studies into a data extraction sheet. Disagreements will be resolved by discussion, or if necessary with the help of a third reviewer.

Where this is insufficient (or unclear) information, where there is an email address provided, the authors will be contacted via email for clarification. Where data is not available for completion of 2x2 tables, the studies will be excluded from the analysis.

***Data to be extracted***

The following information will be extracted from the included studies, where available:

Study identification - author, year, location

Study research question

Study design and setting

Target condition definition/diagnostic criteria

Participant characteristics and numbers, including exclusions

Index test

Reference standard

Flow of participants through study including losses to follow-up

Patient presentation and prior testing

Conduct of the study including timing of the tests, and information on masking

Absolute counts of true positive (TP), false positive (FP), false negative (FN) and true negative (TN) diagnoses.

Statistical analyses that were performed, including whether all participants were included in analyses

Additional summary information on participant preference, timing, or cost, as available.

### ***Assessment of methodological quality***

To assess methodological quality, we will use the Quality Assessment of Diagnostic Accuracy Studies-2 (QUADAS-2) tool (Whiting et al 2011). Two reviewers will independently assess studies' methodological quality; disagreements will be resolved by discussion, or if necessary, by a third reviewer. The QUADAS-2 tool facilitates assessment of bias in four areas: patient selection; index test; reference standard; flow and timing; and also facilitates assessment of applicability of the studies to the review research question.

The data will be presented in a tables showing risk of bias and applicability within each domain assessed for each study. These data will be considered in relation to interpreting the results of the studies.

### ***Statistical analysis and data synthesis***

Analyses will be conducted for each category of condition specified. Summary tables will detail study information including the patient sample, condition, study design, the test under evaluation, and the comparator.

### ***Meta-analysis***

For each test, RevMan will be used to produce paired forest plots to explore the between-study variability of sensitivity and specificity across the included studies. For each study estimate of sensitivity and specificity, corresponding 95% confidence intervals will be shown

to illustrate the uncertainty related to each study estimate. If accuracy has been reported at multiple common thresholds, forest plots will be sub-grouped on threshold.

Bivariate meta-analysis methods (Reitsma et al 2005) will be used to generate pooled estimates of sensitivity and specificity where sufficient data is available for each test or condition. These will be plotted with 95% confidence and prediction ellipses in Receiver Operating Characteristic (ROC) space. Where appropriate, summary ROC curves will also be plotted, drawing on the equivalence of the bivariate method and the hierarchical summary ROC meta-analysis model (Rutter and Gatsonis 2001; Harbord et al 2007). For these analyses, we will use WinBUGS or the metandi command in Stata, as appropriate, and feed parameters directly into Revman to produce Cochrane-standardised output.

Where appropriate, meta-analysis models that include multiple thresholds will be employed (e.g. Steinhauser et al 2016 or similar).

#### *Investigating heterogeneity*

For medical conditions for which data from more than one study are available, it may be possible to investigate heterogeneity in the results. Two approaches will be used to explore the sources of between-study heterogeneity: 1) inclusion of study level characteristics as covariates in the bivariate model (meta-regression) 2) carrying out sub-group analyses. These approaches will only be carried out if there is sufficient data available and sub-group specific pooled estimates are thought to be of clinical relevance. Any meta-regressions will be carried out using WinBUGS or the xtmelogit command in Stata.

#### *Sensitivity analyses*

If there appear to be any outliers in the data, these studies will be removed from the analysis to evaluate the impact on the overall pooled estimates.

#### *Investigating reporting bias*

Funnel plots used to detect publication bias in reviews of RCTs have been shown to be misleading for diagnostic test accuracy reviews (Deeks et al 2005; Leeflang et al 2008). Funnel plots as an assessment of reporting bias will therefore not be included in this review. Publication bias will be assessed using Deek's test, as recommended by the Cochrane Handbook, where data allows (Deeks et al 2005).

### **Funding**

This project is funded by National Institute for Health Research School for Primary Care Research (NIHR SPCR) [ProjectNumber 390]

### **Declarations of conflict of interest**

Dr. Plüddemann reports grants from NIHR, grants from NIHR School of Primary Care Research, during the conduct of the study; and occasionally receives expenses for teaching Evidence-Based Medicine. Dr. Heneghan reports receiving expenses and fees for his media work. He has received expenses from the WHO and holds grant funding from the NIHR, the NIHR School of Primary Care Research, The Wellcome Trust and the WHO. He has received financial remuneration from an asbestos case. He has also received income from the

publication of a series of toolkit books published by Blackwells. On occasion, he receives expenses for teaching EBM and is also paid for his GP work in NHS out of hours. CEBM jointly runs the EvidenceLive Conference with the BMJ and the Overdiagnosis Conference with some international partners which are based on a non-profit making model.

## References

- Cooke G, Valenti L, Glasziou P, Britt H. Common general practice presentations and publication frequency. *Aust Fam Physician*. 2013;42(1-2):65-8.
- Deeks JJ, Macaskill P, Irwig L. The performance of tests of publication bias and other sample size effects in systematic reviews of diagnostic test accuracy was assessed. *J Clin Epidemiol*. 2005;58(9):882-93
- Donofrio JC, Weiner SG. Female patient self-diagnosis compared with emergency physician diagnosis of urinary tract infection. *J Emerg Med*. 2013;45(6):969-73. doi: 10.1016/j.jemermed.2013.07.019
- Harbord RM, Deeks JJ, Egger M, Whiting P, Sterne JA. A unification of models for meta-analysis of diagnostic accuracy studies. *Biostatistics*. 2007 Apr;8(2):239-51.
- Hedayati SS, Bosworth HB, Kuchibhatla M, Kimmel PL, Szczech LA. The predictive value of self-report scales compared with physician diagnosis of depression in hemodialysis patients. *Kidney Int*. 2006 May;69(9):1662-8.
- Hobbs FDR, Bankhead C, Mukhtar T, Stevens S, Perera-Salazar R, Holt T, Salisbury C; National Institute for Health Research School for Primary Care Research. Clinical workload in UK primary care: a retrospective analysis of 100 million consultations in England, 2007–14. *The Lancet*; 387; 10035: 2323-2330
- Leeflang MM, Deeks JJ, Gatsonis C, Bossuyt PM; Cochrane Diagnostic Test Accuracy Working Group. Systematic reviews of diagnostic test accuracy. *Ann Intern Med*. 2008; 16;149(12): 889-97
- Rutter CM, Gatsonis CA. A hierarchical regression approach to meta-analysis of diagnostic test accuracy evaluations. *Stat Med*. 2001 Oct 15;20(19):2865-84.
- Reitsma JB, Glas AS, Rutjes AW, Scholten RJ, Bossuyt PM, Zwinderman AH. Bivariate analysis of sensitivity and specificity produces informative summary measures in diagnostic reviews. *J Clin Epidemiol*. 2005 Oct;58(10):982-90
- Review Manager (RevMan) [Computer program]. Version 5.3. Copenhagen: The Nordic Cochrane Centre, The Cochrane Collaboration, 2014
- Steinhauser S, Schumacher M, Rücker G. Modelling multiple thresholds in meta-analysis of diagnostic test accuracy studies. *BMC Med Res Methodol*. 2016 Aug 12;16(1):97. doi: 10.1186/s12874-016-0196-1.
- Tormo MJ, Navarro C, Chirlaque MD, Barber X. Validation of self diagnosis of high blood pressure in a sample of the Spanish EPIC cohort: overall agreement and predictive values. EPIC Group of Spain. *J Epidemiol Community Health*. 2000 Mar;54(3):221-6.

**Supplementary Table 5: Characteristics of included studies**

| Disease/condition     | Author, year     | Design                                | Setting                                                              | Country           | Study duration | Number of participants | Mean age* (years)            | Female (%) |
|-----------------------|------------------|---------------------------------------|----------------------------------------------------------------------|-------------------|----------------|------------------------|------------------------------|------------|
| Vaginal infection     | Donders 2016     | Prospective diagnostic accuracy study | Birth control, general gynaecology, infertility and prenatal clinics | Uganda            | N/A            | 360                    | 28.3                         | 100        |
|                       | Sungkar 2012     | RCT (intervention arm only)           | Prenatal clinics or hospitals                                        | Indonesia         | 24 weeks       | 176                    | 28                           | 100        |
|                       | Geva 2006        | Prospective diagnostic accuracy study | Gynaecologic clinics                                                 | Israel            | N/A            | 593                    | 18 – 60 range                | 100        |
|                       | Ryan-Wenger 2010 | Prospective diagnostic accuracy study | Military clinics                                                     | USA               | N/A            | 546                    | 25.7                         | 100        |
|                       | Jones 2013       | RCT (both arms)                       | Clinics or home                                                      | Brazil            | N/A            | 695                    | 18 – 40 range                | 100        |
| Common skin condition | Bregnhøj 2011    | Prospective cohort                    | Not reported                                                         | Denmark           | 18 months      | 502                    | 17.5                         | 95         |
|                       | Svensson 2002    | Prospective diagnostic accuracy study | Dermatology outpatient clinics                                       | Sweden            | N/A            | 208                    | 40.4                         | 50         |
|                       | Elsner 2015      | Prospective diagnostic accuracy study | Not reported                                                         | Germany & Austria | N/A            | 165                    | ≥18 years                    | 81         |
|                       | Josefson 2011    | Prospective diagnostic accuracy study | Hospital dermatology departments                                     | Sweden            | N/A            | 243                    | 44                           | 69         |
| HIV                   | Assimwe 2014     | RCT (unsupervised arm only)           | Home                                                                 | Uganda            | N/A            | 123                    | 28 (23–32), median (IQR)     | 47         |
|                       | Belete 2019      | Cross-sectional                       | Public health facilities                                             | Ethiopia          | N/A            | 400                    | 29 (17.7–40.3), median (IQR) | 61         |
|                       | Choko 2011       | Cross-sectional                       | Home                                                                 | Malawi            | N/A            | 241                    | 27 (NR) median (IQR)         | 52         |
|                       | Choko 2015       | RCT (intervention arm only)           | Home                                                                 | Malawi            | 2 years        | 2370                   | NR                           | NR         |



|  |                     |                 |                                                 |              |        |       |                                                     |    |
|--|---------------------|-----------------|-------------------------------------------------|--------------|--------|-------|-----------------------------------------------------|----|
|  | Kapaku 2017         | Cohort          | Home/Voluntary counselling & testing facilities | Zambia       | 1 year | 2572  | 26 (21–35), median (IQR)                            | 59 |
|  | Kurth 2016          | Cross-sectional | NR (not at home)                                | Kenya        | N/A    | 240** | 36                                                  | 33 |
|  | Martinez Perez 2016 | Cross-sectional | Health care clinics/HIV testing sites           | South Africa | N/A    | 2205  | Male: 27 (11-36)<br>Female: 28 (22-36) median (IQR) | 66 |
|  | Orasure 2012        | Cross-sectional | Study site                                      | USA          | N/A    | 5798  | NR                                                  | 50 |
|  | Pant Pai 2013       | Cross-sectional | Hospital                                        | South Africa | N/A    | 251   | ≥18 years                                           | 79 |

RCT – randomised control trial; N/A – not applicable; NR – not reported, \* unless otherwise indicated, \*\* Subset (N=113) that used laboratory reference standard included in systematic review and pooled analysis.

**Supplementary Table 6: Characteristics of self-diagnosis (index) tests and reference standard tests**

| Disease/condition | Author, year     | Test for                                                | Self-diagnosis test (index)                                       | Self-diagnosis test threshold                   | Reference test                                                                                                                                                                                                                    | Reference test threshold                                                                                                                                                                                        | Interval between index & reference test | Data collection points                             |
|-------------------|------------------|---------------------------------------------------------|-------------------------------------------------------------------|-------------------------------------------------|-----------------------------------------------------------------------------------------------------------------------------------------------------------------------------------------------------------------------------------|-----------------------------------------------------------------------------------------------------------------------------------------------------------------------------------------------------------------|-----------------------------------------|----------------------------------------------------|
| Vaginal infection | Donders 2016a    | Bacterial vaginosis                                     | Vaginal fluid test using pH strip                                 | +/- (≥ 4.5 pH)                                  | Air dried vaginal fluid test using gram staining (Nugent score)<br>Assessment by central laboratory                                                                                                                               | +/- (≥ 4.5 pH, Nugent score 7-10)                                                                                                                                                                               | NR                                      | N/A                                                |
|                   | Donders 2016b    |                                                         |                                                                   | +/- (≥ 4.7 pH)                                  |                                                                                                                                                                                                                                   | +/- (≥ 4.7 pH, Nugent score 7-10)                                                                                                                                                                               |                                         |                                                    |
|                   | Sungkar 2012     | Bacterial vaginosis                                     | Vaginal fluid test using pH strip                                 | +/-                                             | Vaginal fluid test using microbiological gram staining test (Kopeloff modified Gram stain)<br>Prepared by midwives for laboratory assessment                                                                                      | +/-                                                                                                                                                                                                             | NR                                      | Baseline, 16 – 18, 18 – 20, 20 – 22, 22 – 24 weeks |
|                   | Geva 2006        | Bacterial vaginosis and/or <i>Trichomonas vaginalis</i> | Vaginal discharge test using panty liner test kit (VI-SENSE)      | +/- (based on strip colour, no level reported*) | Clinical diagnosis plus vaginal wall swabs testing pH (nitrazine paper), amine, culture (InPouch TV, BioMed Diagnostic) and gram staining (Nugent score).<br>Assessment by board certified gynaecologists and central laboratory. | BV: >3: (a) homogeneous discharge, (b) pH value >4.5, (c) release of fishy odor (KOH was added to the vaginal discharge, and (d) presence of clue cells; or 7+ Nugent score of gram stain<br>TV: +/- by culture | Within 6 hours                          | N/A                                                |
|                   | Ryan-Wenger 2010 | Bacterial vaginosis and/or <i>Trichomonas vaginalis</i> | Vaginal fluid test using Women in the military self-diagnosis kit | +/- (based on ≥ 4.7 pH, amines,                 | Clinical interview plus vaginal fluid test for pH (nitrazine paper, amines (FemExam card), whiff, wet mount                                                                                                                       | +/-                                                                                                                                                                                                             | None                                    | N/A                                                |

|                       |                  |                                           |                                                                                           |                                                       |                                                                                                                                                                                                                                                          |                                                                                               |          |                                |
|-----------------------|------------------|-------------------------------------------|-------------------------------------------------------------------------------------------|-------------------------------------------------------|----------------------------------------------------------------------------------------------------------------------------------------------------------------------------------------------------------------------------------------------------------|-----------------------------------------------------------------------------------------------|----------|--------------------------------|
|                       |                  |                                           | (includes FemExam card)                                                                   | vaginal itching)                                      | microscopy (Affirm VPIII Microbial Identification Test)<br>Assessment by women's health nurse practitioner plus in clinic microscopy testing                                                                                                             |                                                                                               |          |                                |
|                       | Ryan-Wenger 2010 | <i>Candida</i> vaginitis                  | Vaginal fluid test using Women in the military self-diagnosis kit (includes FemExam card) | +/- (based on $\geq 4.7$ pH, amines, vaginal itching) | Clinical interview plus vaginal fluid test for pH (nitrazine paper, amines (FemExam card), whiff, wet mount microscopy (Affirm VPIII Microbial Identification Test)<br>Assessment by women's health nurse practitioner plus in clinic microscopy testing | +/-                                                                                           | None     | N/A                            |
|                       | Jones 2013       | <i>Trichomonas vaginalis</i>              | Vaginal fluid testing using dipstick test (OSOM Trichomonas rapid test)                   | +/- (two red lines)                                   | Vaginal fluid test using PCR test<br>Assessment at central laboratory                                                                                                                                                                                    | +/-                                                                                           | None     | N/A                            |
| Common skin condition | Bregnhøj 2011    | Eczema                                    | Questionnaire on presence of eczema                                                       | Positive response                                     | Hand Eczema Severity Index (HECSI)<br>Interpretation by clinician                                                                                                                                                                                        | +ve for presence of eczema                                                                    | Same day | Inclusion & 18 month follow-up |
|                       | Svensson 2002    | Hand eczema                               | Questionnaire on presence of eczema                                                       | Positive response                                     | Hand examination for erythema, papules, vesicles, scaling, fissures, lichenification and hyperkeratotic areas.<br>Assessment by experienced dermatologist                                                                                                | +ve if erythema and papules / vesicles OR erythema and scaling and fissures / lichenification | None     | N/A                            |
|                       | Elsner 2015      | Allergic reaction to nickel and fragrance | Irritant reaction to surgical tapes on upper arm after 48 hours                           | +/-                                                   | Irritant reaction to surgical tapes on upper arm after 48 hours<br>Assessment by clinician                                                                                                                                                               | +/-                                                                                           | None     | N/A                            |
|                       | Josefson 2011    | Allergic reaction to nickel               | Medical plaster patches (Nixema) on upper arm with                                        | +/-                                                   | Medical plaster patches (Finn                                                                                                                                                                                                                            | +/-                                                                                           | Same day | N/A                            |

|     |               |                              |                                                                                            |     |                                                                                                                                                                                                                                                |     |                |                                                   |
|-----|---------------|------------------------------|--------------------------------------------------------------------------------------------|-----|------------------------------------------------------------------------------------------------------------------------------------------------------------------------------------------------------------------------------------------------|-----|----------------|---------------------------------------------------|
|     |               |                              | readings on days 3-4                                                                       |     | chambers® on Scanpor® tape or IQ Ultra® Chambers) on back with readings on days 3-4 and/or day 7<br>Assessment by dermatologist                                                                                                                |     |                |                                                   |
| HIV | Assiimwe 2014 | Antibodies for HIV1 and HIV2 | Oral fluid test using OraQuick® In-Home Rapid HIV-1/2 Antibody Test (Orasure Technologies) | +/- | Finger pick blood test. Nationally approved algorithm of POC rapid HIV tests (Determine (Abbot Laboratories), STAT-PAK (Chembio Diagnostic Systems Inc) and Unigold (Trinity Biotech plc) as a tiebreaker). Assessment by research assistants. | +/- | 12 -72 hours   | N/A                                               |
|     | Belete 2019   | Antibodies for HIV1 and HIV2 | Oral fluid test using OraQuick® Rapid HIV-1/2 Antibody Test (Orasure Technologies)         | +/- | Finger pick blood test. Nationally approved algorithm of POC rapid HIV tests (Wanti (Beijing), Unigold (Trinity Biotech plc), Vikia). Assessment by health professional.                                                                       | +/- | Same time      | N/A                                               |
|     | Choko 2011    | Antibodies for HIV1 and HIV2 | Oral fluid test using OraQuick ADVANCE® Rapid HIV-1/2 Antibody Test                        | +/- | Finger pick blood test. Algorithm of POC rapid HIV tests (Determine (Abbot Laboratories), Unigold (Trinity Biotech plc) and SD Bioline HIV i/II (Standard Diagnostics, Inc.) as a tiebreaker). Assessment by counsellor.                       | +/- | Same time      | N/A                                               |
|     | Choko 2015    | Antibodies for HIV1 and HIV2 | Oral fluid test using OraQuick ADVANCE® Rapid HIV-1/2 Antibody Test                        | +/- | Finger pick blood test. Two parallel POC rapid HIV tests (Determine (Abbot Laboratories), Unigold (Trinity Biotech plc)). Assessment by nurse.                                                                                                 | +/- | Approx. 1 week | 1 – 12, 13 – 24 months (max. 1 test in 12 months) |

|  |                     |                              |                                                                                            |     |                                                                                                                                                                                             |     |                |                                |
|--|---------------------|------------------------------|--------------------------------------------------------------------------------------------|-----|---------------------------------------------------------------------------------------------------------------------------------------------------------------------------------------------|-----|----------------|--------------------------------|
|  | Kapaku 2017         | Antibodies for HIV1 and HIV2 | Oral fluid test using OraQuick® rapid HIV-1/2 Antibody Test (Orasure Technologies)         | +/- | Venous blood test (EDTA tube) Testing in certified central laboratory (Abbott Architect HIV1 Ag/Ab combo assay, positive results confirmed by BioRad GS HIV combo Ag/Ab assay)              | +/- | Within 8 hours | Once in 12 month study period. |
|  | Kurth 2016          | Antibodies for HIV1 and HIV2 | Oral fluid test using OraQuick ADVANCE® Rapid HIV-1/2 Antibody Test                        | +/- | Venous blood test. ELISA testing by single person in certified central laboratory (Vironostika HIV Uni-Form II Ag/Ab (bioMe'rieux Inc.))                                                    | +/- | Within 8 hours | N/A                            |
|  | Martinez Perez 2016 | Antibodies for HIV1 and HIV2 | Oral fluid test using OraQuick ADVANCE® Rapid HIV-1/2 Antibody Test                        | +/- | Finger pick blood test. POC rapid HIV tests (Determine (Abbot Laboratories), confirmatory Unigold (Trinity Biotech plc)). Assessment by HIV counsellor.                                     | +/- | Same time      | N/A                            |
|  | Orasure 2012        | Antibodies for HIV1 and HIV2 | Oral fluid test using OraQuick® In-Home Rapid HIV-1/2 Antibody Test (Orasure Technologies) | +/- | Venous blood test. FDA approved serum EIA and Western blot in FDA approved laboratory.                                                                                                      | +/- | Unclear        | N/A                            |
|  | Pant Pai 2013       | Antibodies for HIV1 and HIV2 | Oral fluid test using OraQuick® rapid HIV-1/2 Antibody Test (Orasure Technologies)         | +/- | Venous blood test. ELISA with p24 Antigen tests in reference laboratories all within 24 hours (Architect HIV Ag/Ab combo (Abbott Laboratories), positive results confirmed by Western Blot) | +/- | Same time      | N/A                            |

HIV - Human immunodeficiency virus, POC – Point of care, max. – maximum, FDA – Food and Drug Administration, USA, N/A – not applicable; NR – not reported; KOH – potassium hydroxide; PCR – polymerase chain reaction; \* whilst no reported level was given for VI-SENSE, it was reported that the polymer used in this product had a range of 4.3 – 5.1 pH
